# Supplementary material for: Excellent Response to OnabotulinumtoxinA: Different Definitions, Different Predictors
Source: MDPI journal article supplement (doi:10.3390/ijerph191710975), 2022-09-02
Supplement: s1 [file s1]

**Table S1.** Overview of the study centers.

| Center                    | No. (%) of patients included | Inclusion period     | Stopped treatment or lost to follow-up at 3 months (n, %) | Stopped treatment or lost to follow-up at 6 months (n, %) | Stopped treatment or lost to follow-up at 9 months (n, %) |
|---------------------------|------------------------------|----------------------|-----------------------------------------------------------|-----------------------------------------------------------|-----------------------------------------------------------|
| Hull                      | 707 (24.6)                   | July 2010 – Mar 2020 | 2 (0.3)                                                   | 256 (36.2)                                                | 384 (54.3)                                                |
| Rome (Sant'Andrea)        | 564 (19.6)                   | Jan 2017 – Mar 2020  | 1 (0.2)                                                   | 8 (1.4)                                                   | 17 (3.0)                                                  |
| San Giovanni Rotondo      | 455 (15.8)                   | Mar 2013 – Mar 2020  | 60 (13.2)                                                 | 117 (25.7)                                                | 147 (32.3)                                                |
| Barcelona (Vall d'Hebron) | 248 (8.6)                    | July 2014 – Sep 2018 | 0                                                         | 54 (21.8)                                                 | 85 (34.3)                                                 |
| Milan (San Raffaele)      | 159 (5.5)                    | May 2015 – May 2020  | 3 (1.9)                                                   | 10 (6.3)                                                  | 32 (20.1)                                                 |
| Naples (Vanvitelli)       | 107 (3.7)                    | Feb 2015 – Jul 2020  | 0                                                         | 0                                                         | 0                                                         |
| Bologna                   | 102 (3.5)                    | Jan 2014 – May 2020  | 1 (1.0)                                                   | 3 (2.9)                                                   | 34 (33.3)                                                 |
| Rome (Campus Biomedico)   | 92 (3.2)                     | Sep 2013 – Apr 2020  | 0                                                         | 0                                                         | 2 (2.2)                                                   |
| Milan (Besta)             | 78 (2.7)                     | Oct 2017 – Oct 2019  | 3 (3.8)                                                   | 8 (10.3)                                                  | 11 (14.1)                                                 |
| Modena                    | 75 (2.6)                     | Jan 2015 – Jan 2020  | 0                                                         | 0                                                         | 0                                                         |
| London (St Thomas')       | 70 (2.4)                     | Jan 2019 – Sep 2020  | 0                                                         | 2 (2.0)                                                   | 15 (21.4)                                                 |
| Moscow (Sechenov)         | 53 (1.8)                     | Jan 2018 – Mar 2020  | 0                                                         | 9 (5.2)                                                   | 12 (22.6)                                                 |
| L'Aquila                  | 52 (1.8)                     | Dec 2016 – July 2018 | 0                                                         | 0                                                         | 0                                                         |
| Munich                    | 48 (1.7)                     | Dec 2019 – May 2020  | 0                                                         | 6 (12.5)                                                  | 17 (35.4)                                                 |
| Parma                     | 45 (1.6)                     | Feb 2014 – Apr 2016  | 0                                                         | 19 (42.2)                                                 | 30 (66.7)                                                 |
| Wroclaw                   | 24 (0.8)                     | Nov 2017 – Jun 2020  | 3 (12.5)                                                  | 4 (16.7)                                                  | 13 (54.2)                                                 |
| TOTAL                     | 2879                         |                      | 73 (2.5)                                                  | 496 (17.2)                                                | 799 (27.8)                                                |
